# Supplementary material for: Evaluation of Innovative Dried Purée from Jerusalem Artichoke—In Vitro Studies of Its Physicochemical and Health-Promoting Properties
Source: MDPI journal article supplement (doi:10.3390/molecules26092644), 2021-04-30
Supplement: s1 [file s1]

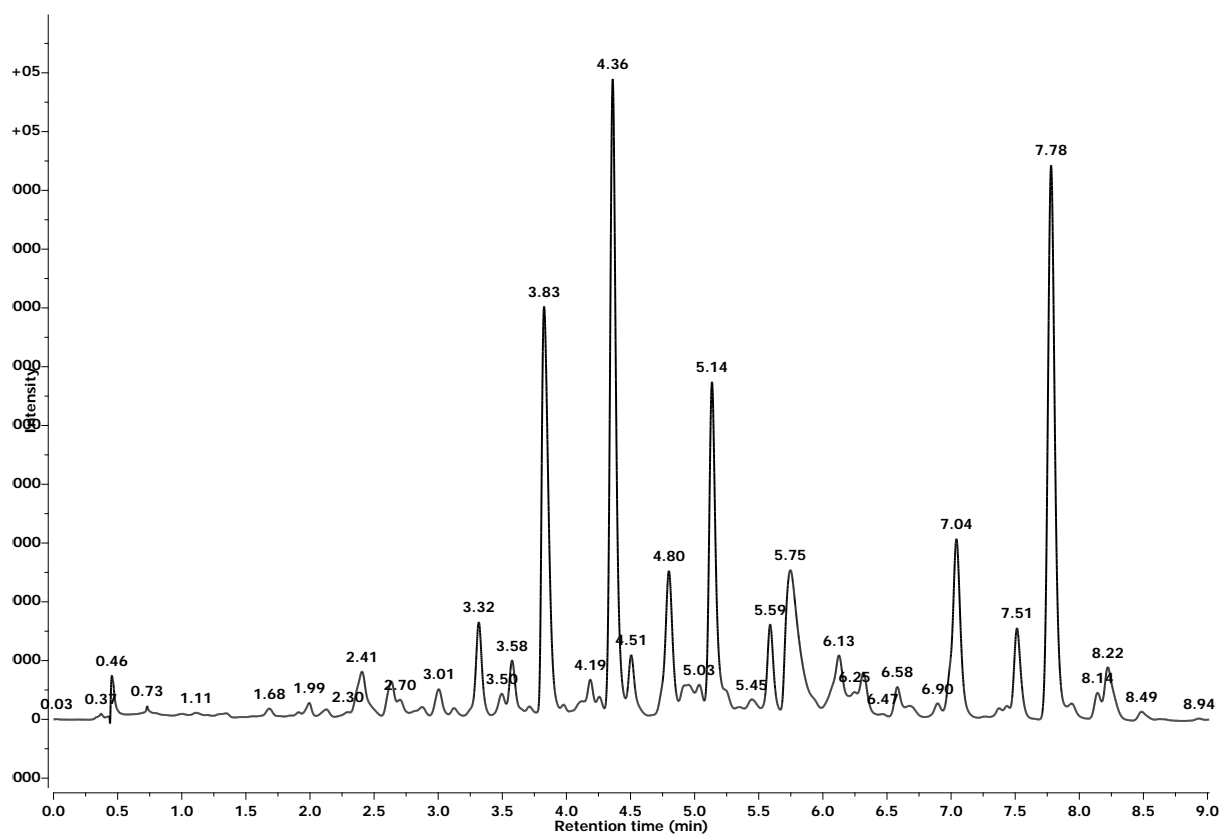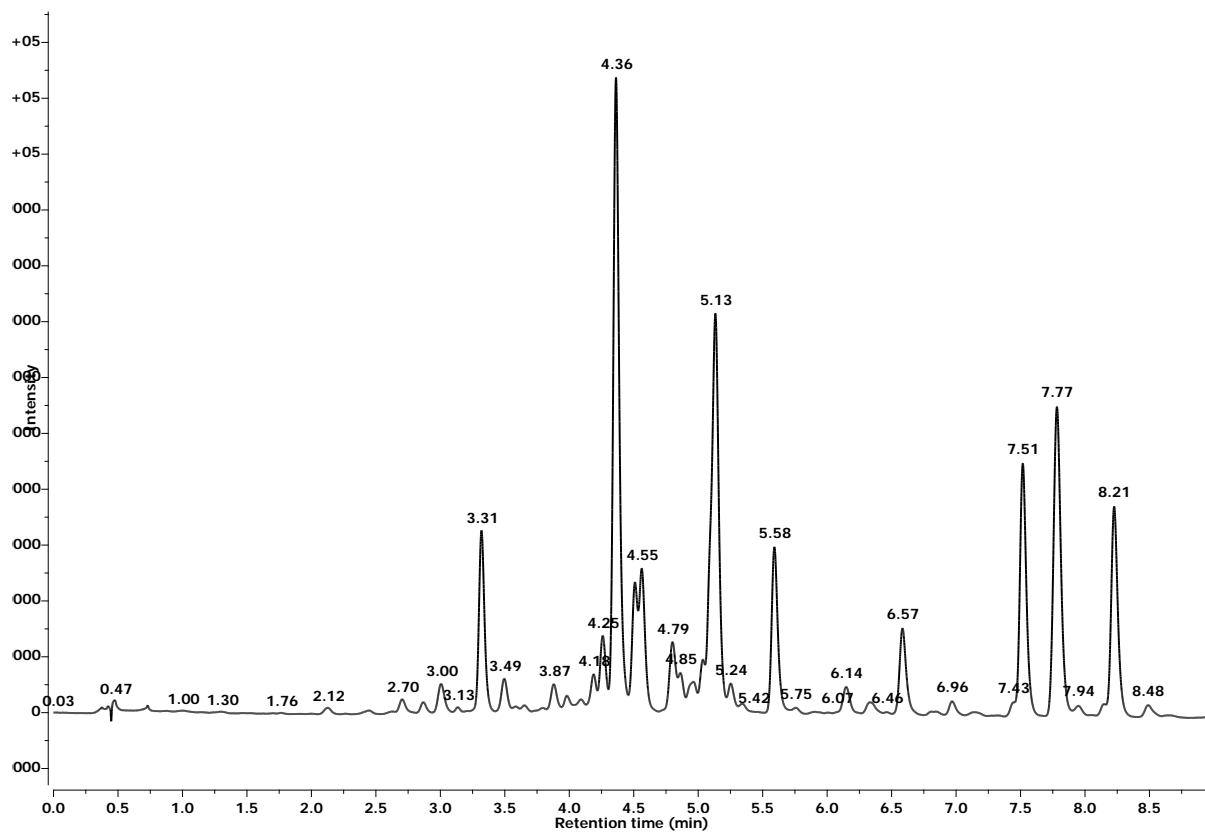

Supplementary Materials S1. Chromatograms registered at 280 nm of dried purée from Jerusalem artichoke: with derivatives of SO<sub>2</sub> (1), without derivatives of SO<sub>2</sub> (2).
